# Supplementary material
Source: PubMed Central journal article supplement (PMC4520164)
Supplement: ASN.2014040408_ASN2014040408SupplementaryData.pdf [file ASN.2014040408_ASN2014040408SupplementaryData.pdf]

**Supplementary Table 1. Treatment before Admission in Stage I Cohort<sup>a</sup>**

|                                               | Total (n=317) | No AKI (n=213) | AKI (n=104) | P     |
|-----------------------------------------------|---------------|----------------|-------------|-------|
| Use ACEI/ARB, n (%) <sup>b</sup>              | 107(33.7)     | 73(34.2)       | 34(32.6)    | 0.780 |
| Drug index of ACEI/ARB <sup>c</sup>           | 4.1±1.2       | 4.2±1.2        | 4.0±1.3     | 0.332 |
| Use spironolactone, n (%) <sup>b</sup>        | 113(35.6)     | 74(34.7)       | 39(37.5)    | 0.708 |
| Drug index of spironolactone <sup>c</sup>     | 1.1±0.2       | 1.0±0.2        | 1.1±0.3     | 0.417 |
| Drug score of RAAS blocker <sup>c</sup>       | 5.2±1.2       | 5.2±1.1        | 5.1±1.4     | 0.437 |
| Use of diuretic, n (%) <sup>b</sup>           | 127(40.1)     | 81(38.0)       | 46(44.2)    | 0.290 |
| Use of high-dose diuretic, n (%) <sup>d</sup> | 8(2.5)        | 3(1.5)         | 5(4.8)      | 0.120 |

<sup>a</sup> Continuous variables were expressed as mean ±SD, categorical variables were expressed as a number (%).

<sup>b</sup> Defined as receiving the drugs for more than 4 weeks before admission.

<sup>c</sup> Calculated as previously described (Flanigan MJ, Khairullah QT, Lim VS. Dialysis sodium delivery can alter chronic blood pressure management, *Am J Kidney Dis.* 1997; 29: 383-391).

<sup>d</sup> Defined as daily dose of furosemide >80 mg or the equivalent.

**Abbreviations:** ACEI, angiotensin converting enzyme inhibitors; ARB, angiotensin II type I receptor blockers. RAAS, renin-angiotensin-aldosterone system.

**Supplementary Table 2. Characteristics of Patients on Admission in Stage II Cohort<sup>a</sup>**

|                                           | Total (n=119)    | No AKI (n=82)    | AKI (n=37)        | P     |
|-------------------------------------------|------------------|------------------|-------------------|-------|
| <b>Demographics variables</b>             |                  |                  |                   |       |
| Age, years                                | 67.4±13.6        | 65.1±13.9        | 71.7±12.1         | 0.014 |
| Gender, male, n (%)                       | 72(60.5)         | 51(62.1)         | 21(56.8)          | 0.685 |
| <b>Pre-existing clinical conditions</b>   |                  |                  |                   |       |
| Hypertension, n (%)                       | 54(45.4)         | 30(36.6)         | 24(64.9)          | 0.005 |
| Diabetes, n (%)                           | 31(26.1)         | 15(18.3)         | 16(43.2)          | 0.006 |
| CKD, n (%) <sup>b</sup>                   | 24(20.2)         | 9(10.9)          | 15(40.5)          | 0.000 |
| Atrial fibrillation, n (%)                | 32(26.8)         | 22(26.8)         | 10(27.0)          | 1.000 |
| Prior hospitalization for HF, n (%)       | 68(57.1)         | 48(58.5)         | 20(54.1)          | 0.692 |
| <b>Primary causes of heart failure</b>    |                  |                  |                   |       |
| Ischemic heart disease, n (%)             | 65(54.6)         | 45 (54.8)        | 20(54.1)          | 1.000 |
| Hypertension, n (%)                       | 19(16.0)         | 11(13.4)         | 8(21.6)           | 0.286 |
| Rheumatic heart disease, n (%)            | 10(8.4)          | 8(9.8)           | 2(5.4)            | 0.724 |
| Cardiomyopathy, n (%)                     | 17(14.3)         | 13(15.9)         | 4(10.8)           | 0.578 |
| Other, n (%)                              | 8(6.7)           | 5(6.1)           | 3(8.1)            | 0.703 |
| <b>Characteristics on admission</b>       |                  |                  |                   |       |
| LVEF<45%, n (%)                           | 58(48.7)         | 39(47.6)         | 19(51.4)          | 0.843 |
| NYHA (class IV), n (%)                    | 49(41.2)         | 32(39.0)         | 17(45.9)          | 0.548 |
| NT-proBNP, pg/ml                          | 4285(1859-9000)  | 2933(1250-6774)  | 7250(4286-14177)  | 0.001 |
| Systolic BP, mm Hg                        | 129.2±21.7       | 130.2±21.2       | 127.0±22.7        | 0.457 |
| Diastolic BP, mm Hg                       | 76.8±16.6        | 77.6±17.4        | 75.2±15.0         | 0.469 |
| Serum creatinine, µmol/L                  | 118.2±66.2       | 103.4±49.8       | 146.1±83.3        | 0.001 |
| Serum albumin, mmol/L                     | 36.9±4.9         | 37.8±4.6         | 35.1±5.2          | 0.005 |
| Serum triglyceride, mmol/L                | 1.3±0.6          | 1.2±0.5          | 1.3±0.8           | 0.757 |
| Serum cholesterol, mmol/L                 | 4.1±1.1          | 4.0±1.0          | 4.5±1.4           | 0.062 |
| Hemoglobin, g/L                           | 127.1±22.9       | 132.1±17.9       | 117.5±28.2        | 0.001 |
| UACR, mg/g                                | 90.5(29.5-222.1) | 62.2(20.3-175.7) | 169.0(66.8-401.5) | 0.001 |
| <b>Use of ACEI/ARB, n (%)<sup>c</sup></b> | 29(24.4)         | 18(22.0)         | 11(29.7)          | 0.366 |
| <b>Use of diuretic, n (%)<sup>d</sup></b> | 33(27.7)         | 20(24.4)         | 13(35.1)          | 0.270 |

<sup>a</sup> Continuous variables were expressed as mean ± SD or median (25th percentile-75th percentile, IQR). Categorical variables were expressed as a number (%).

<sup>b</sup> Defined as pre-admission eGFR<60ml/min/1.73m<sup>2</sup>. Pre-admission eGFR=the mean of at least 3 measurements over a six-month period before admission.

<sup>c</sup> Defined as receiving ACEI/ARB for more than 4 weeks before admission.

<sup>d</sup> Defined as receiving diuretics for more than 4 weeks before admission.

**Abbreviations:** CKD, chronic kidney disease; LVEF, left ventricular ejection fraction; NYHA, New York Heart Association; BP, blood pressure; UACR, urine albumin to creatinine ratio; ACEI, angiotensin converting enzyme inhibitors; ARB, angiotensin II type I receptor blockers.

## Supplementary Figure 1. Flow Chart of Enrollment and Follow-up of the Study Participants

### Stage I

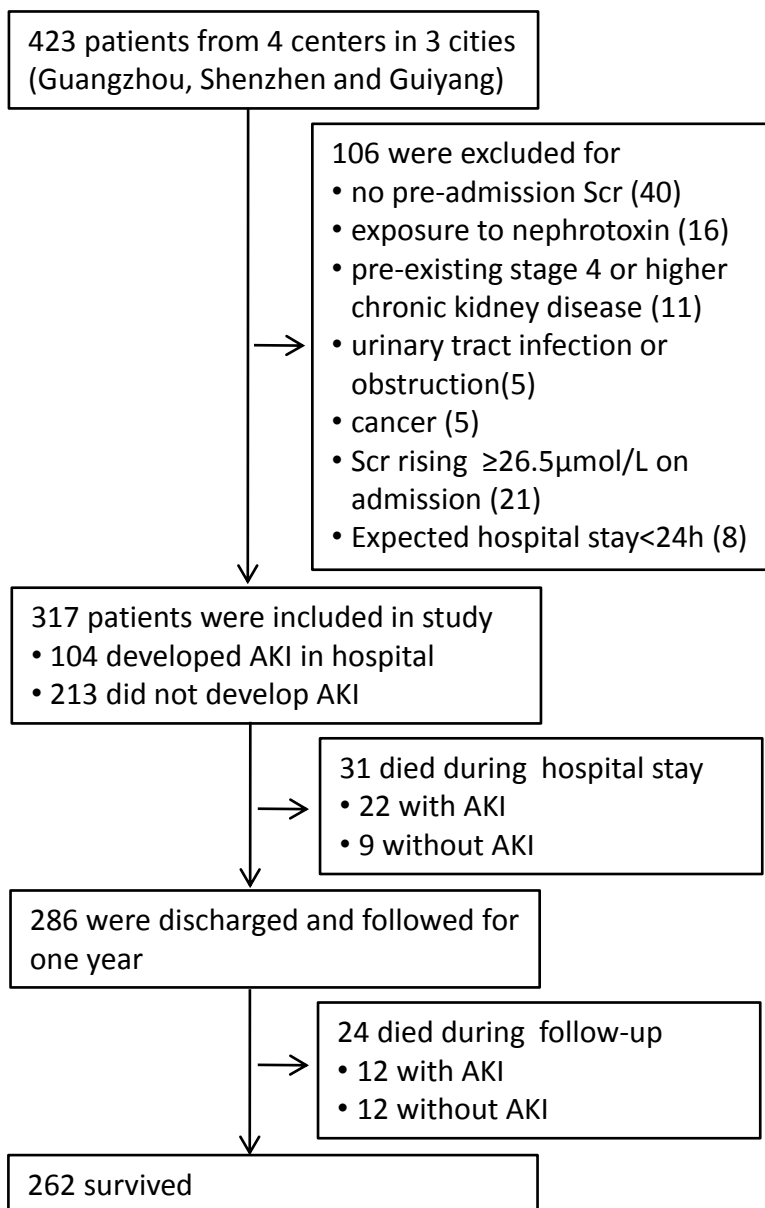

### Stage II

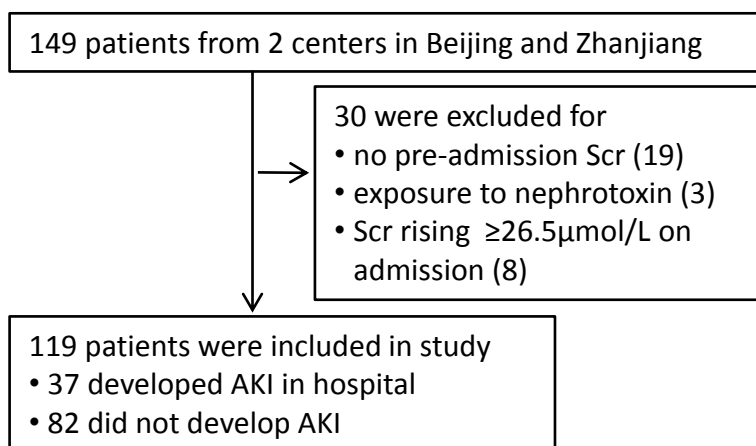

## Supplementary Figure 2. Analysis of uAGT and Plasma AGT in Stage I Cohort

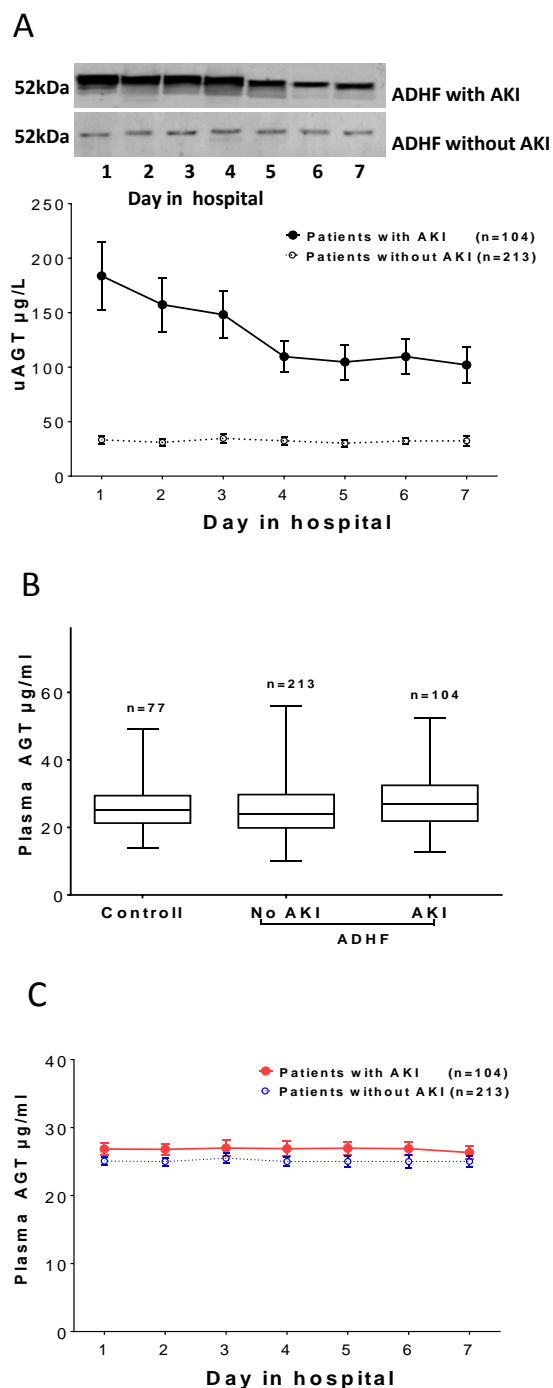

A: Upper graph shows representative western-blot of urine samples obtained at various time points after admission from a patient who subsequently developed AKI and a patient who did not develop AKI. Lower graph shows mean uAGT level at various time points after admission. B: Median of plasma AGT concentration on admission in ADHF patients and healthy volunteers. C: Mean plasma AGT concentration at various time points after admission. Plasma AGT levels were measured by ELISA. Error bars are SE.

**Supplementary Figure 3. Association between uAGT Level and Incidence of AKI in Stage I Cohort**

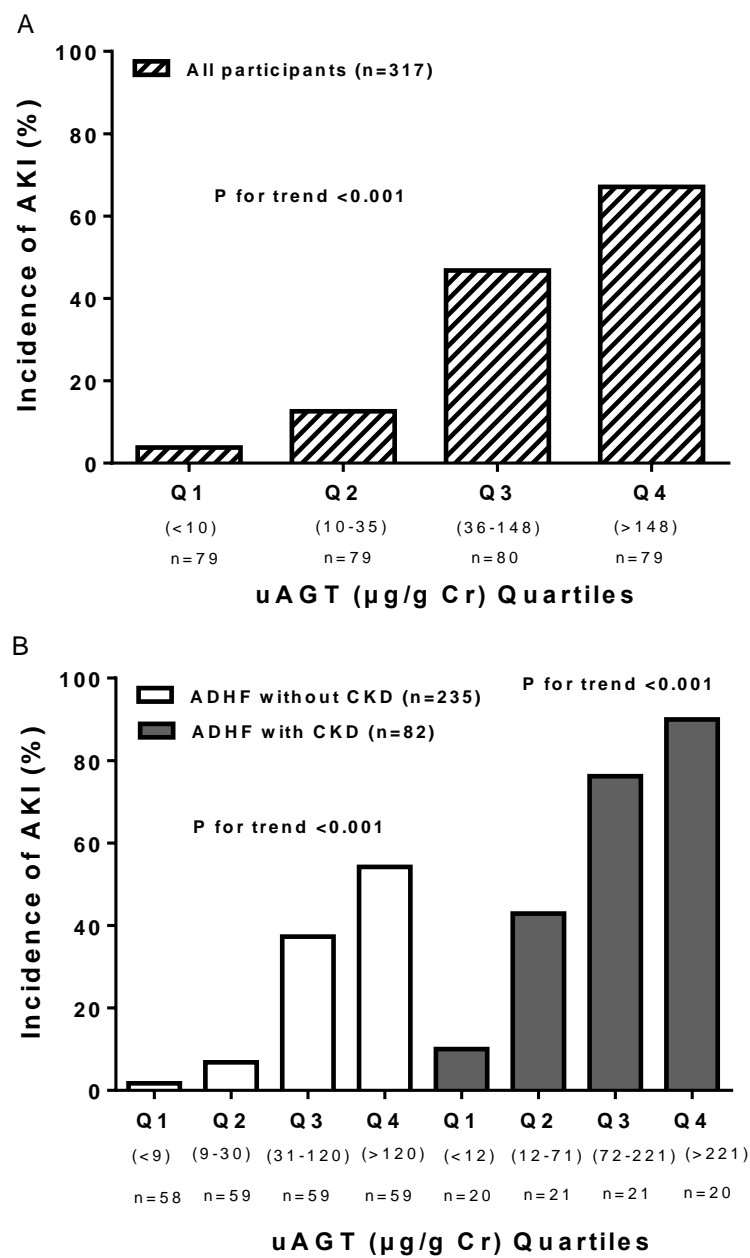

A: Quartiles of uAGT on admission and incidence of AKI. B: Quartiles of uAGT on admission and incidence of AKI in patients with and without pre-existing CKD.

Supplementary Figure 4. Kaplan-Meier Analyses for One-Year Prognosis in Stage I Cohort

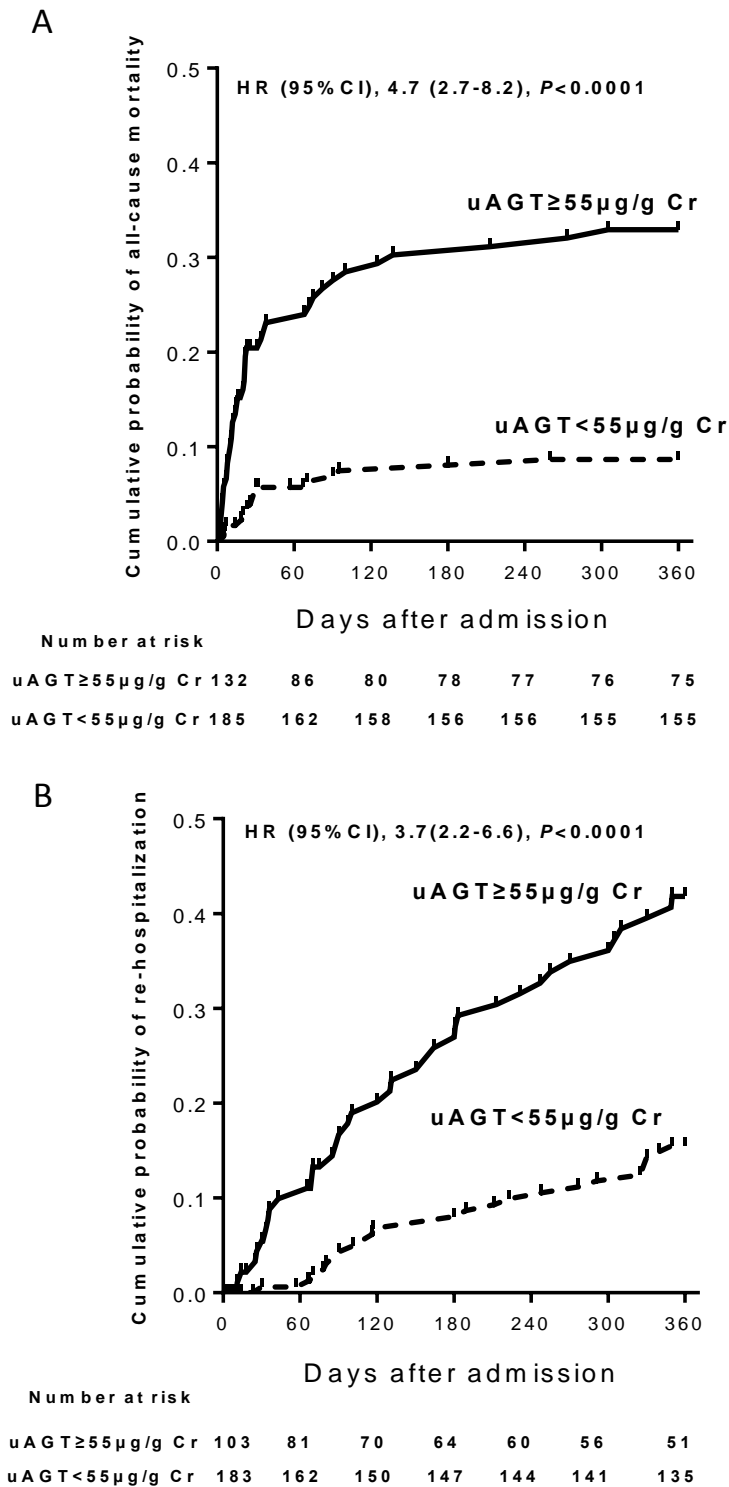

A: Cumulative probability of all-cause mortality from admission to one year follow-up according to the category of uAGT level. B: Cumulative probability of re-hospitalization from discharge to one year follow-up according to the category of uAGT level.
